# Supplementary material
Source: publisher site journal article supplement (https://www.spandidos-publications.com/8672/downloadSupplementary)
Supplement: Supplementary file 1 [file downloadSupplementary]

Table SI. Exercise-induced effects that may reduce the risk of AD.

| <b>A, Effects on mitochondria</b>                  |                                   |                                                                                                                                                                                                                                                                           |                                                                                                                 |                |
|----------------------------------------------------|-----------------------------------|---------------------------------------------------------------------------------------------------------------------------------------------------------------------------------------------------------------------------------------------------------------------------|-----------------------------------------------------------------------------------------------------------------|----------------|
| <b>First author/s, year</b>                        | <b>Model/participants</b>         | <b>Exercise</b>                                                                                                                                                                                                                                                           | <b>Key mechanisms</b>                                                                                           | <b>(Refs.)</b> |
| Pang <i>et al</i> , 2019                           | APP/PS1 mice                      | Forced swimming (1 h/day; 6 days/week; 4 weeks); water temperature, 21-23°C; water depth, 40 cm; no external loading reported                                                                                                                                             | Improved mitochondrial morphology (clearer boundaries and compact/intact cristae), Ctx/Hpc ATP ↑, GLUT1/GLUT3 ↑ | (57)           |
| Wang <i>et al</i> , 2022                           | APP/PS1 mice                      | Wheel running, 18 r/min, 40 min/day, 6 days/week, 5 months, voluntary                                                                                                                                                                                                     | AMPK ↑, TFEB ↑, LC3 ↑, Rab7/Rab9 ↑                                                                              | (59)           |
| Zhao <i>et al</i> , 2020; Zhao <i>et al</i> , 2023 | APP/PS1 mice                      | Treadmill exercise, 45 min/day, 5 days/week for 12 weeks, after a 6-day familiarization period; 5 m/min for 5 min, 8 m/min for 5 min, 12 m/min for 30 min and 5 m/min for 5 min                                                                                           | PINK1 ↑, Parkin ↑, LC3 ↑, PGC-1α/TFAM ↑, NRFs ↑, SIRT1 ↑, FOXO1/3 ↓                                             | (35,61)        |
| Klein <i>et al</i> , 2019                          | Aβ peptide oligomer-injected rats | Involuntary swimming, no additional load, 30 min/day, 5 days/week, 4 weeks; water temperature, 32±1°C                                                                                                                                                                     | α-KGDH ↑, complex IV ↑, Mfn1 ↑, Drp1 ↓                                                                          | (58)           |
| Koo <i>et al</i> , 2017                            | NSE/APP mice                      | Treadmill running, 5 days/week for 12 weeks after 5-day acclimation; 10 m/min, 30-50 min/day in weeks 1-4, then 12 m/min, 50-60 min/day in weeks 5-12                                                                                                                     | SIRT1/PGC-1α ↑                                                                                                  | (34)           |
| Morais <i>et al</i> , 2025                         | APP/PS1 mice                      | Treadmill exercise; acute: After 5 days of adaptation (6 m/min, 10 min/day), one bout at 60% MAP, 0% incline, for 45 min; chronic: 8 weeks, 4 sessions/week, at 60% MAP, 0% incline, 15-45 min/session with progressive increase                                          | REV-ERBα ↑, NR1D1 gene expression ↑, ALP ↑                                                                      | (62)           |
| <b>B, Effects on ROS</b>                           |                                   |                                                                                                                                                                                                                                                                           |                                                                                                                 |                |
| <b>First author/s, year</b>                        | <b>Model/participants</b>         | <b>Exercise</b>                                                                                                                                                                                                                                                           | <b>Key mechanisms</b>                                                                                           | <b>(Refs.)</b> |
| Zhang <i>et al</i> , 2019                          | APP/PS1 mice                      | Treadmill running, 5 days/week for 12 weeks after 5-day acclimation; 10 m/min, 30-50 min/day in weeks 1-4, then 12 m/min, 50-60 min/day in weeks 5-12                                                                                                                     | Hpc Mn-SOD ↑, GSH ↑, MDA ↓                                                                                      | (86)           |
| Li <i>et al</i> , 2019                             | APP/PS1 mice                      | Treadmill exercise; after 3 days of adaptation (10-15 m/min, 15 min/day), mice underwent 12 weeks of training, 5 days/week; HIIT: 9 bouts at 85% Smax for 1.5 min interspersed with 9 bouts at 45% Smax for 2 min; MICT: Continuous running at 60% Smax, distance-matched | ROS ↓, H <sub>2</sub> O <sub>2</sub> ↓, MDA ↓, SOD ↑, CAT ↑, Drp1 ↓, FIS1 ↓, Mfn1 ↑, Mfn2 ↑, OPA1 ↑             | (87)           |
| <b>C, Effects on inflammation</b>                  |                                   |                                                                                                                                                                                                                                                                           |                                                                                                                 |                |
| <b>First author/s, year</b>                        | <b>Model/participants</b>         | <b>Exercise</b>                                                                                                                                                                                                                                                           | <b>Key mechanisms</b>                                                                                           | <b>(Refs.)</b> |
| Mu <i>et al</i> , 2022                             | 3xTg-AD mice                      | Treadmill exercise, after 3-day adaptation, 12 weeks, 5 days/week: 12 m/min for 10 min plus 15 m/min for 50 min, 0° incline, 1 h/day, 50-65% VO <sub>2</sub> max                                                                                                          | IL-1β ↓, IL-6 ↓, TNFα ↓, GSK3β activity ↓                                                                       | (116)          |
| Zhang <i>et al</i> , 2019                          | APP/PS1 mice                      | Treadmill exercise for 12 weeks, 5 days per week, 45 min per                                                                                                                                                                                                              | ADAM10 ↑                                                                                                        | (105)          |

|                                 |                                   |                                                                                                                                                                                                                                                                                                                                                                    |                                                                                                                                                  |       |
|---------------------------------|-----------------------------------|--------------------------------------------------------------------------------------------------------------------------------------------------------------------------------------------------------------------------------------------------------------------------------------------------------------------------------------------------------------------|--------------------------------------------------------------------------------------------------------------------------------------------------|-------|
| Morais <i>et al</i> , 2025      | APP/PS1 mice                      | session, at 5-12 m/min<br>Treadmill exercise; acute: After 5 days of adaptation (6 m/min, 10 min/day), one bout at 60% MAP, 0% incline, for 45 min; chronic: 8 weeks, 4 sessions/week, at 60% MAP, 0% incline, 15-45 min/session with progressive increase                                                                                                         | TLR4 ↓                                                                                                                                           | (62)  |
| Nichol <i>et al</i> , 2008      | Tg2576 AD mice                    | Voluntary wheel running in cage for 3 weeks; self-paced; mean wheel rotations/day, 3,954±877                                                                                                                                                                                                                                                                       | IL-1β ↓, TNF-α ↓, IFN-γ ↑, MIP-1α ↑, IL-10 ↑                                                                                                     | (117) |
| Zhang <i>et al</i> , 2019       | APP/PS1 mice                      | Treadmill running, 5 days/week for 12 weeks after 5-day acclimation; 10 m/min, 30-50 min/day in weeks 1-4, then 12 m/min, 50-60 min/day in weeks 5-12                                                                                                                                                                                                              | Microglia (M2/M1 ratio) ↑, pro-inflammatory cytokines ↓                                                                                          | (86)  |
| Mejías-Peña <i>et al</i> , 2017 | Elderly subjects (69.6±1.5 years) | Resistance training, 2 sessions/week for 8 weeks after a 10-min cycle ergometer warm-up; leg press, biceps curl and pec deck; for each of the three exercises, week 1: 3x8 at 60% 1RM; week 2: 3x10 at 60% 1RM; week 3: 3x12 at 60% 1RM; week 4: 3x8 at 70% 1RM; week 5: 3x10 at 70% 1RM; week 6: 3x12 at 70% 1RM; week 7: 3x8 at 80% 1RM; week 8: 3x10 at 80% 1RM | Beclin-1 ↑, ATG12 ↑, ATG16 ↑, LAMP2 ↑, NLRP3 inflammasome ↓, caspase-1/pro-caspase-1 ↓, Bcl-2 ↓, Bcl-xL ↓, Bad ↓, Bad/Bcl-2 ratio ↓, caspase-3 ↓ | (102) |

#### D, Effects on synaptic plasticity

| First author/s, year            | Model/participants | Exercise                                                                                                                                                                                                                                                      | Key mechanisms                                                                                                                     | (Refs.) |
|---------------------------------|--------------------|---------------------------------------------------------------------------------------------------------------------------------------------------------------------------------------------------------------------------------------------------------------|------------------------------------------------------------------------------------------------------------------------------------|---------|
| Pang <i>et al</i> , 2019        | APP/PS1 mice       | Forced swimming (1 h/day, 6 days/week, 4 weeks); water temperature, 21-23°C; water depth, 40 cm; no external loading reported                                                                                                                                 | PSD-95 ↑, SYP ↑                                                                                                                    | (57)    |
| Li <i>et al</i> , 2017          | Aging rats         | Treadmill aerobic exercise, 5-day adaptation (10 m/min, 10-20 min/day), then 12 weeks at 12 m/min, 0% incline, 60 min/day, 3 or 5 days/week                                                                                                                   | Ctx age-related Rac1/Cdc42 elevation ↓, Hpc age-related Rac1/Cdc42 reduction reversed, cofilin ↓, synaptophysin/synaptic density ↑ | (142)   |
| Qiu <i>et al</i> , 2023         | 3xTg-AD mice       | Treadmill exercise, 1-week adaptation (10 m/min, 0° incline, 30 min/day for 2 days, then 60 min/day for 3 days), followed by 6 months of training at 10 m/min for the first 10 min and 12 m/min for the remaining 50 min, 0° incline, 60 min/day, 5 days/week | NG2 protein and mRNA ↑                                                                                                             | (143)   |
| Yu <i>et al</i> , 2024          | APP/PS1 mice       | Treadmill running, 5 days/week for 8 weeks after 3-day acclimation; 12 m/min for 10 min and 15 m/min for 50 min, 60 min/day, at 0% incline                                                                                                                    | GluA1/2 ↑, GluA1 (S831/S845) phosphorylation ↑, AMPAR ↑, LTP ↑                                                                     | (144)   |
| García-Mesa <i>et al</i> , 2014 | 3xTg-AD mice       | Voluntary wheel running, 3 months, free access, with                                                                                                                                                                                                          | p-CREB/CREB ↑, BDNF ↑                                                                                                              | (127)   |

|                           |                                   |                                                                                                                                                                |        |      |
|---------------------------|-----------------------------------|----------------------------------------------------------------------------------------------------------------------------------------------------------------|--------|------|
| Pang <i>et al</i> , 2019  | APP/PS1 mice                      | continuous activity recording<br>Forced swimming (1 h/day; 6 days/week; 4 weeks); water temperature, 21-23°C; water depth, 40 cm; no external loading reported | BDNF ↑ | (57) |
| Klein <i>et al</i> , 2019 | Aβ peptide oligomer-injected rats | Involuntary swimming, no additional load, 30 min/day, 5 days/week, 4 weeks; water temperature, 32±1°C                                                          | SYP ↑  | (58) |

↑, increased/upregulated; ↓, decreased/downregulated; 1RM, one-repetition maximum; 3xTg-AD, triple-transgenic AD; Aβ, amyloid-β; AD, Alzheimer's disease; ADAM10, a disintegrin and metalloproteinase domain-containing protein 10; ALP, autophagy-lysosome pathway; AMPAR, α-amino-3-hydroxy-5-methyl-4-isoxazolepropionic acid receptor; AMPK, AMP-activated protein kinase; APP/PS1, amyloid precursor protein/presenilin 1; ATG12, autophagy related 12; ATG16, autophagy related 16; BDNF, brain-derived neurotrophic factor; CAT, catalase; Cdc42, cell division cycle 42; CREB, cAMP response element-binding protein; H<sub>2</sub>O<sub>2</sub>, hydrogen peroxide; HIIT, high-intensity interval training; Ctx, cortex; Drp1, dynamin-related protein 1; GluA1/2, glutamate ionotropic receptor AMPA type subunit 1/2; GLUT1/GLUT3, glucose transporter 1/3; GSH, glutathione; Hpc, hippocampus; LAMP2, lysosome-associated membrane protein 2; LTP, long-term potentiation; MDA, malondialdehyde; MAP, maximal aerobic power; Mfn1, mitofusin 1; Mfn2, mitofusin 2; MICT, moderate-intensity continuous training; MIP-1α, macrophage inflammatory protein-1α; Mn-SOD, manganese superoxide dismutase; NG2, neural/glial antigen 2; NLRP3, NOD-like receptor family pyrin domain containing 3; NR1D1, nuclear receptor subfamily 1 group D member 1; NRF, nuclear respiratory factor; NSE/APP, neuron-specific enolase/amyloid precursor protein; p-, phosphorylated; PGC-1α, peroxisome proliferator-activated receptor γ coactivator 1-α; PINK1, PTEN-induced kinase 1; PSD-95, postsynaptic density protein 95; r/min, revolutions per minute; REV-ERBα, nuclear receptor subfamily 1 group D member 1α; ROS, reactive oxygen species; SIRT1, sirtuin 1; Smax, maximal running speed; SOD, superoxide dismutase; SYP, synaptophysin; TFAM, mitochondrial transcription factor A; TFEB, transcription factor EB; TLR4, toll-like receptor 4; VO<sub>2</sub>max, maximal oxygen uptake; α-KGDH, α-ketoglutarate dehydrogenase.

Table SII. Conditional framework defining circumstances under which exercise and fluoxetine may be more likely to interact synergistically or antagonistically in AD.

| <b>First author/s, year</b>                                                                                             | <b>Interaction domain</b>                  | <b>Conditions more likely to favor synergy</b>                                                                                                                                                | <b>Conditions more likely to favor antagonism</b>                                                                                                              | <b>Biological or clinical rationale</b>                                                                                                                                                                                                                   | <b>(Refs.)</b> |
|-------------------------------------------------------------------------------------------------------------------------|--------------------------------------------|-----------------------------------------------------------------------------------------------------------------------------------------------------------------------------------------------|----------------------------------------------------------------------------------------------------------------------------------------------------------------|-----------------------------------------------------------------------------------------------------------------------------------------------------------------------------------------------------------------------------------------------------------|----------------|
| Aisen <i>et al</i> , 2017; Tarawneh and Holtzman, 2012; Livingston <i>et al</i> , 2024; Lyketsos and Olin, 2002         | Disease stage and clinical context         | MCI or early AD, particularly when depressive symptoms, anxiety or sleep disturbance reduce adherence to rehabilitation or regular exercise                                                   | Moderate-to-severe AD, particularly when accompanied by marked frailty, limited exercise tolerance or reduced functional reserve                               | Combined treatment is more likely to be beneficial when the main objective is to improve adherence, relieve mood-related barriers and target potentially reversible dysfunction, rather than to reverse advanced multisystem decline                      | (7,8,13,158)   |
| Radak <i>et al</i> , 2008; Merry and Ristow, 2016; Ristow <i>et al</i> , 2009; Mallett and McGrath, 2025                | Exercise prescription                      | Regular, sustainable, low-to-moderate intensity aerobic exercise, with modality tailored to tolerance and functional capacity                                                                 | Excessive exercise load, poorly matched modality, or training approaching or exceeding the adaptive threshold                                                  | Exercise-related benefit depends in part on adaptive remodeling triggered by manageable physiological stress; excessive loading may shift the response from adaptation toward oxidative, inflammatory or functional burden                                | (24,32,85,89)  |
| Tutakhail <i>et al</i> , 2019; Bougea <i>et al</i> , 2024; Andersen <i>et al</i> , 2014; Hirschbeck <i>et al</i> , 2022 | Fluoxetine exposure                        | Low-dose initiation, gradual titration and individualized treatment course                                                                                                                    | High-dose exposure, adverse effects that reduce exercise participation or adherence, or an exposure level that functionally suppresses exercise responsiveness | Although fluoxetine may support mood and engage overlapping neurobiological targets, excessive exposure may reduce exercise capacity or interfere with adaptive signaling relevant to mitochondrial remodeling, autophagic regulation and neuroplasticity | (16,21,23,25)  |
| Tutakhail <i>et al</i> , 2019; Mahdirezaji <i>et al</i> , 2023; Radak <i>et al</i> , 2008; Ristow <i>et al</i> , 2009   | Timing of combined intervention            | Pharmacological support introduced in a manner that facilitates participation in training without interrupting early adaptive responses                                                       | Fluoxetine introduced too early relative to training adaptation or under conditions in which adaptive signals are still being established                      | Part of the proposed benefit of exercise depends on transient ROS- and inflammation-related signaling; excessive or prematurely timed pharmacological suppression may blunt these initiating signals                                                      | (16,18,24,85)  |
| Livingston <i>et al</i> , 2024; Haaksma <i>et al</i> , 2017; Demurtas <i>et al</i> , 2020                               | Comorbidity profile                        | Depression, anxiety, sleep disturbance or cardiometabolic comorbidity, in which improved adherence, vascular-metabolic regulation and sustained participation are realistic therapeutic goals | Chronic pain, osteoporosis, osteoarthritis, Parkinsonian features or coordination disorders that narrow the safe exercise window                               | The net effect of combined treatment depends on whether comorbidity broadens or constrains the compatibility window between pharmacological support and safe, sustainable training                                                                        | (13,260,271)   |
| Hirschbeck <i>et al</i> , 2022; Forte and De Vito, 2019; Demurtas <i>et al</i> , 2020                                   | Physical reserve and safety considerations | Adequate mobility and tolerance, allowing exercise to be implemented consistently and progressively                                                                                           | Unsteady gait, impaired coordination, pronounced fatigue or elevated fall risk                                                                                 | In vulnerable patients, the key issue shifts from theoretical pathway complementarity to whether the combined intervention compromises safety, balance or exercise feasibility                                                                            | (25,245,271)   |
| Tang <i>et al</i> , 2021; Qin <i>et al</i> , 2023; Tutakhail <i>et al</i> , 2019; Sun <i>et al</i> , 2013;              | Overall interpretation of interaction      | Biologically plausible complementarity across shared targets, including stress regulation, inflammatory modulation and                                                                        | Non-additive or potentially adverse interaction when exercise load, drug exposure                                                                              | Synergy should not be assumed; the combined effect is more appropriately interpreted as conditional rather than deterministic                                                                                                                             | (14-18,21)     |

|                                                                                                                                                                                                                                                                                                                                                                              |                                          |                                                                                      |                                                                                                                                                                   |                                                                                                                                                                                                                                                                       |                                                |
|------------------------------------------------------------------------------------------------------------------------------------------------------------------------------------------------------------------------------------------------------------------------------------------------------------------------------------------------------------------------------|------------------------------------------|--------------------------------------------------------------------------------------|-------------------------------------------------------------------------------------------------------------------------------------------------------------------|-----------------------------------------------------------------------------------------------------------------------------------------------------------------------------------------------------------------------------------------------------------------------|------------------------------------------------|
| <p>Mahdirejei <i>et al</i>, 2023;<br/> Bougea <i>et al</i>, 2024<br/> Roy <i>et al</i>, 2023; Cui <i>et al</i>,<br/> 2018; Drummond and<br/> Wisniewski, 2017;<br/> Sasaguri <i>et al</i>, 2017; Qian<br/> <i>et al</i>, 2024; Granzotto <i>et</i><br/> <i>al</i>, 2024; Demurtas <i>et al</i>,<br/> 2020; Baker <i>et al</i>, 2025;<br/> López-Ortiz <i>et al</i>, 2023</p> | <p>Level of supporting<br/> evidence</p> | <p>neuroplasticity<br/> Mechanistically supported and<br/> hypothesis-generating</p> | <p>and patient condition are<br/> poorly matched<br/> Clinically unconfirmed;<br/> antagonistic risk cannot be<br/> excluded under mismatched<br/> conditions</p> | <p>The current evidence base remains predominantly<br/> preclinical; accordingly, both beneficial and<br/> detrimental interaction patterns should be interpreted<br/> as hypotheses for future subgroup analyses, rather<br/> than as established clinical rules</p> | <p>(119,120,258,259,<br/> 261,262,270-272)</p> |
|------------------------------------------------------------------------------------------------------------------------------------------------------------------------------------------------------------------------------------------------------------------------------------------------------------------------------------------------------------------------------|------------------------------------------|--------------------------------------------------------------------------------------|-------------------------------------------------------------------------------------------------------------------------------------------------------------------|-----------------------------------------------------------------------------------------------------------------------------------------------------------------------------------------------------------------------------------------------------------------------|------------------------------------------------|

---

AD, Alzheimer's disease; MCI, mild cognitive impairment; ROS, reactive oxygen species.
